# Supplementary material for: BET-independent MLV-based Vectors Target Away From Promoters and Regulatory Elements
Source: PubMed Central journal article supplement — Mol Ther Nucleic Acids. 2014 Jul 29;3(7):e179–. doi: 10.1038/mtna.2014.33 (PMC4121521; doi:10.1038/mtna.2014.33), 2014-07-29
Supplement: mtna201433x2.pdf [file mtna201433x2.pdf]

**Figure S2**

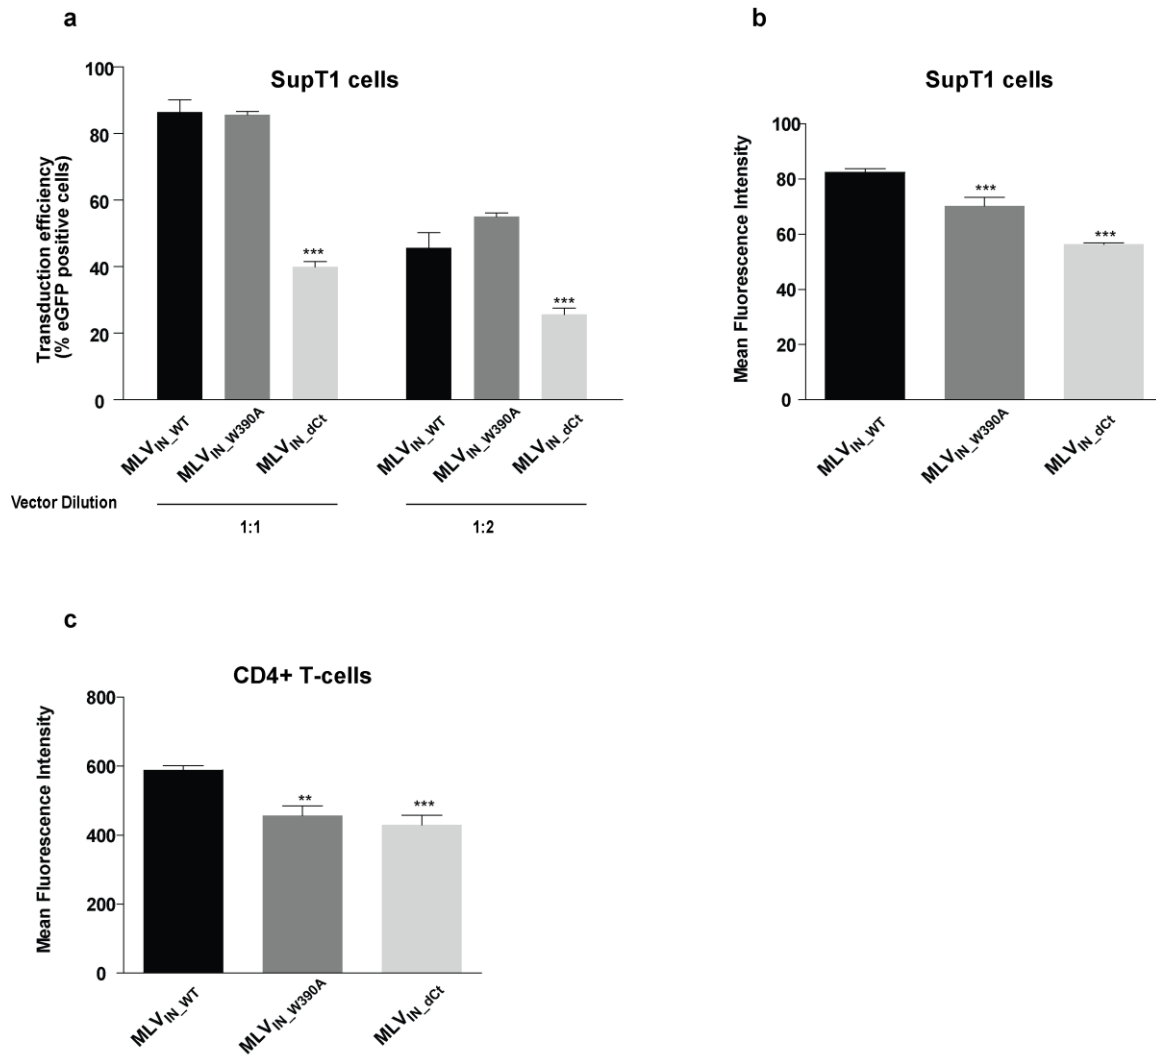

**Figure S2: Transduction efficiency and mean fluorescence intensity for BinMLV vectors**

(a) SupT1 cells were transduced with equal RT-units of the indicated BinMLV vectors expressing eGFP. After 10 days, the percentage of eGFP-positive cells was determined for indicated vector dilutions. Average values and standard deviations of triplicate measurements are shown.

(b-c) Mean fluorescence intensity of SupT1 cells (b) and CD4+ T-cells (c) transduced with the indicated MLV-derived vectors at  $\text{MOI} \leq 1$  (i.e. <50% eGFP positive cells, see Figs 2b-c, respectively). Data represent means and standard errors of the mean (n=6 for SupT1 cells and n=3 for CD4+ T-cells). Differences were determined using Student's t test. \*\* $p < 0.01$ , \*\*\* $p < 0.001$ .
