# Supplementary material for: BET-independent MLV-based Vectors Target Away From Promoters and Regulatory Elements
Source: PubMed Central journal article supplement — Mol Ther Nucleic Acids. 2014 Jul 29;3(7):e179–. doi: 10.1038/mtna.2014.33 (PMC4121521; doi:10.1038/mtna.2014.33), 2014-07-29
Supplement: mtna201433x3.pdf [file mtna201433x3.pdf]

Figure S3

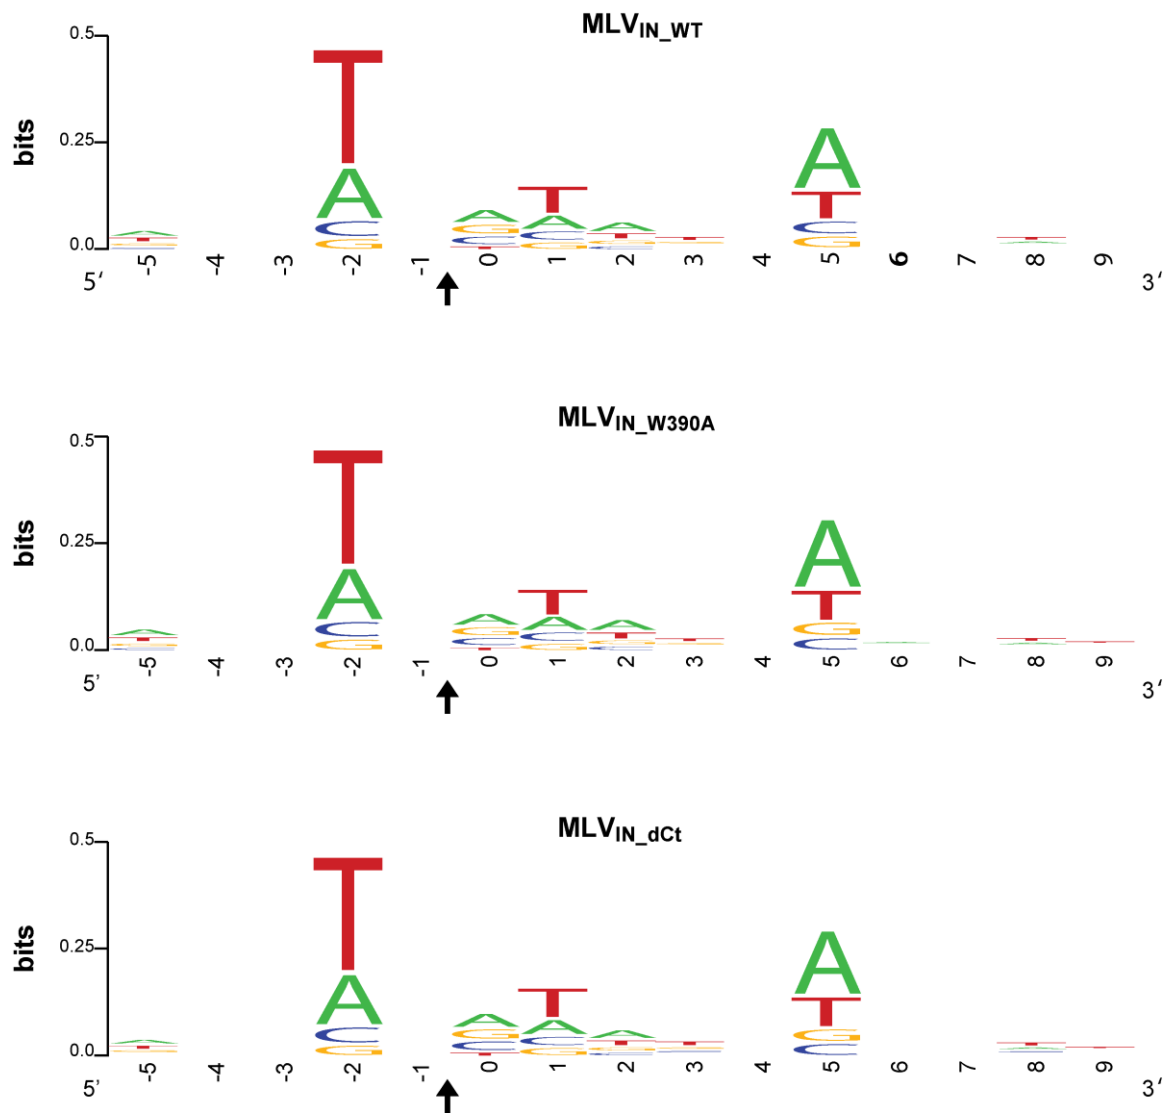

**Figure S3: Loss of the BET interaction does not affect MLV integration site neighborhood**

Sequence logos representing nucleotide frequencies at indicated BinMLV vector integration sites compared to wild type MLV vector. The point of integration is indicated by an arrow. At each position, the height of a letter is proportional to the observed frequency of the

corresponding nucleotide, and the height of each letter stack corresponds to the level of conservation, represented as information content (y-axis, bits).
