# Supplementary material for: BET-independent MLV-based Vectors Target Away From Promoters and Regulatory Elements
Source: PubMed Central journal article supplement — Mol Ther Nucleic Acids. 2014 Jul 29;3(7):e179–. doi: 10.1038/mtna.2014.33 (PMC4121521; doi:10.1038/mtna.2014.33), 2014-07-29
Supplement: mtna201433x6.pdf [file mtna201433x6.pdf]

**Table S1. Oligonucleotides used in this study**

| #  | Name                          | Sequence (5'-3')                                                                                 |
|----|-------------------------------|--------------------------------------------------------------------------------------------------|
| 1  | MLV-IN Ct_F                   | GATCTGGCGGACCCAGCAGTAGACTGACATGGCGGGTGCAGCGGAGCC<br>AGAACCCCTGAAGATCCGGCTGACCAGAGAGGCCCCCTAAA    |
| 2  | MLV-IN Ct_R                   | TCGATTTAGGGGGCCTCTCTGGTCAGCCGGATCTTCAGGGGGTTCTGGCT<br>CCGCTGCACCCGCCATGTTCAGTCTACTGCTGGGTCCGCCA  |
| 3  | MLV-IN Ct W390A/R391A/R394A_F | GATCTGGCGGACCCAGCAGTAGACTGACCGCGGGTGCAGGCGAGCC<br>AGAACCCCTGAAGATCCGGCTGACCAGAGAGGCCCCCTAAA      |
| 4  | MLV-IN Ct W390A/R391A/R394A_R | TCGATTTAGGGGGCCTCTCTGGTCAGCCGGATCTTCAGGGGGTTCTGGCT<br>CGCTGCACCCGCCGCTGTCAGTCTACTGCTGGGTCCGCCA   |
| 5  | MLV-IN Ct K400A/R402A/R405A_F | GATCTGGCGGACCCAGCAGTAGACTGACATGGCGGGTGCAGCGGAGCC<br>AGAACCCCTGGCGATCGCGCTGACCAGAGAGGCCCCCTAAA    |
| 6  | MLV-IN Ct K400A/R402A/R405A_R | TCGATTTAGGGGGCCTCCGCGGTGACGCGATCGCCAGGGGGTTCTGGC<br>TCCGCTGCACCCGCCATGTTCAGTCTACTGCTGGGTCCGCCA   |
| 7  | MLV-IN Ct W390A_F             | GATCTGGCGGACCCAGCAGTCGACTGACAGCGGGTGCAGCGGAGCC<br>AGAACCCCTGAAGATCCGGCTGACCAGAGAGGCCCCCTAAA      |
| 8  | MLV-IN Ct W390A_R             | TCGATTTAGGGGGCCTCTCTGGTCAGCCGGATCTTCAGGGGGTTCTGGCT<br>CCGCTGCACCCGCGCTGTCAGTCGACTGCTGGGTCCGCCA   |
| 9  | MLV-IN Ct R391A_F             | GATCTGGCGGACCCAGCAGTCGACTGACATGGCGGGTGCAGCGGAGCC<br>AGAACCCCTGAAGATCCGGCTGACCAGAGAGGCCCCCTAAA    |
| 10 | MLV-IN Ct R391A_R             | TCGATTTAGGGGGCCTCTCTGGTCAGCCGGATCTTCAGGGGGTTCTGGCT<br>CCGCTGCACCCGCCATGTTCAGTCGACTGCTGGGTCCGCCA  |
| 11 | MLV-IN Ct R394A_F             | GATCTGGCGGACCCAGCAGTCGACTGACATGGCGGGTGCAGGCGAGCC<br>AGAACCCCTGAAGATCCGGCTGACCAGAGAGGCCCCCTAATAAA |
| 12 | MLV-IN Ct R394A_R             | TCGATTTAGGGGGCCTCTCTGGTCAGCCGGATCTTCAGGGGGTTCTGGCT<br>CGCTGCACCCGCCATGTTCAGTCGACTGCTGGGTCCGCCA   |
| 13 | MLV-IN Ct K400A_F             | GATCTGGCGGACCCAGCAGTAGACTGACATGGCGGGTGCAGCGGAGCC<br>AGAACCCCTGGCGATCCGGCTGACCCGAGAGGCCCCCTAAA    |
| 14 | MLV-IN Ct K400A_R             | TCGATTTAGGGGGCCTCTCGGGTCAGCCGGATCGCCAGGGGGTTCTGGC<br>TCCGCTGCACCCGCCATGTTCAGTCTACTGCTGGGTCCGCCA  |
| 15 | MLV-IN Ct R402A_F             | GATCTGGCGGACCCAGCAGTAGACTGACATGGCGGGTGCAGCGGAGCC<br>AGAACCCCTGAAGATCGCGCTGACCCGAGAGGCCCCCTAAA    |
| 16 | MLV-IN Ct R402A_R             | TCGATTTAGGGGGCCTCTCGGGTCAGCGGATCTTCAGGGGGTTCTGGC<br>TCCGCTGCACCCGCCATGTTCAGTCTACTGCTGGGTCCGCCA   |
| 17 | MLV-IN-Ct R405A_F             | GATCTGGCGGACCCAGCAGTAGACTGACATGGCGGGTGCAGCGGAGCC<br>AGAACCCCTGAAGATCCGGCTGACCCGCGAGGCCCCCTAAA    |
| 18 | MLV-IN-Ct R405A_R             | TCGATTTAGGGGGCCTCCGCGGTGACCCGGATCTTCAGGGGGTTCTGGC<br>TCCGCTGCACCCGCCATGTTCAGTCTACTGCTGGGTCCGCCA  |
| 19 | pET_MLV-IN W390A_F            | CCGGGGGTGGACCATCTCTAGACTGACAGCGCGGTTCAACGCTCTCA<br>AAACCCCTTAAAAATAAGATTAACCCGCGAGGCCCCCG        |
| 20 | pET_MLV-IN W390A_R            | TCGACGGGGCCTCGCGGGTAACTTATTTTAAAGGGGTTTTGAGAGC<br>GTTGAACGCGCGCTGTTCAGTCTAGAGGATGGTCCACCC        |
| 21 | pET_MLV-IN 1-380_F            | CCGGGGCAGCAGCAGCGG                                                                               |
| 22 | pET_MLV-IN 1-380_R            | TCGACCGCTGCTGCTGCC                                                                               |
| 23 | MLV IN Core Mut F1            | CACCCCGCCCTTGTA                                                                                  |
| 24 | MLV IN Core Mut R1            | TATGGGGTGAGGCCATGG                                                                               |
| 25 | MLV IN Core E266A F2          | TGCGATCTTATATGGGGCACCCCGCCCTTGTA                                                                 |
| 26 | MLV IN Core E266A R2          | CCCATATAAGATCGCATATGGGGTGAGGCCATGG                                                               |

|    |                      |                                           |
|----|----------------------|-------------------------------------------|
| 27 | MLV IN Core L268A F2 | CGAGATCGCATATGGGGCACCCCCGCCCTTGTA         |
| 28 | MLV IN Core L268A R2 | CCCCATATGCGATCTCGTATGGGGTGAGGCCATGG       |
| 29 | MLV IN Core Y269A F2 | CGAGATCTTAGCTGGGGCACCCCCGCCCTTGTA         |
| 30 | MLV IN Core Y269A R2 | CCCCAGCTAAGATCTCGTATGGGGTGAGGCCATGG       |
| 31 | Gagpol FII NheI      | TTTTGCTAGCATGGGCCAGACTGTTACCAC            |
| 32 | Gagpol R Eco         | ATTAGAATTCGATACTGACCCCTCTG                |
| 33 | MLV IN W391A F I     | TTCAACGCTCTCAAAACCCC                      |
| 34 | MLV IN W391A F II    | CTCAAGACTGACAGCGCGCG TTCAACGCTCTCAAAACCCC |
| 35 | MLV IN W391A R I     | GATGGTCCACCCCCGG                          |
| 36 | MLV IN W391A R II    | CGCGCGCTGTCAGTCTTGAGGATGGTCCACCCCCGG      |
| 37 | MLV IN dC F I        | TAATCCCCTTAATTCTTCTGATGCTC                |
| 38 | MLV IN dC F II       | CCCGGGCTTAATTAATCCCCTTAATTCTTCTGATGCTC    |
| 39 | MLV IN dC R I        | ATTAAGCCCGGGGTCGGCAGCCTTCACG              |
| 40 | MLV IN dC R II       | GTCGGCAGCCTTCACG                          |
| 41 | eGFP-RT1_F           | GGAGCGCACCATCTTCTTCA                      |
| 42 | eGFP-RT1_R           | AGGGGTGTCGCCCTCGAA                        |
| 43 | eGFP-RT              | GCTACAAGACCCGCGCCGAGG                     |
